# Supplementary material for: FNDC5 Attenuates Oxidative Stress and NLRP3 Inflammasome Activation in Vascular Smooth Muscle Cells via Activating the AMPK-SIRT1 Signal Pathway
Source: Hindawi journal article supplement (doi:10.1155/2020/6384803), 2020-05-19
Supplement: f1 [file 6384803.f1.pdf]

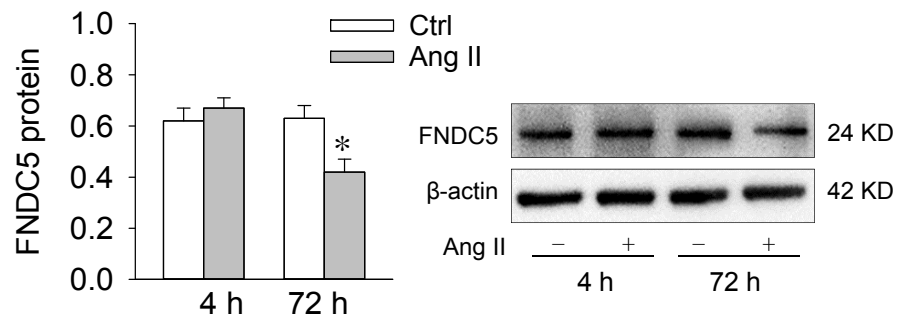

Supplementary Figure 1. Effects of Ang II on FNDC5 protein expressions in A7R5 cells. The cells were treated with Ang II (100 nM) for 4 h or 72 h. Values are mean  $\pm$  SE. \* $P < 0.05$  vs Ctrl.  $n = 3$  per group.

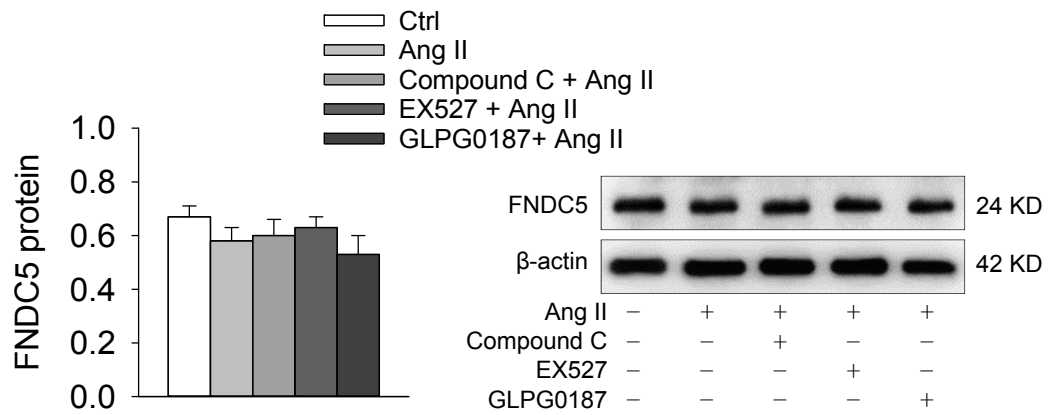

Supplementary Figure 2. Effects of compound C (an AMPK inhibitor), EX527 (a SIRT-1 inhibitor), GLPG0187 (an integrin receptor inhibitor) on FNDC5 protein expressions in Ang II-treated A7R5 cells. The cells were treated with compound C (20  $\mu$ M), EX527 (25  $\mu$ M) or GLPG0187 (1 nM) for 2 h followed by Ang II (100 nM) for 24 h. Values are mean  $\pm$  SE. No significant difference was found among groups. n=3 per group.

Supplementary Table 1 Primers for real-time quantitative PCR analysis

| Animal | Gene  | Primer  | Sequence                 |
|--------|-------|---------|--------------------------|
| Mouse  | FNDC5 | Forward | AGCCAGCAGGAGTTTCTATG'    |
|        |       | Reverse | GCGACAGCATTGGACTCAA      |
|        | GAPDH | Forward | AGGTTGTCTCCTGCGACTTCA    |
|        |       | Reverse | TGGTCCAGGGTT TCTTACTCC   |
| Rat    | FNDC5 | Forward | TCATTGTTGTGGTCCTCTTC-3'  |
|        |       | Reverse | GCTCGTTGTCCTTGATGATA     |
|        | GAPDH | Forward | TTCTTGTGCAGTGCCAGCCTCGTC |
|        |       | Reverse | TAGGAACACGGAAGGCCATGCCAG |
